# Supplementary material
Source: PubMed Central journal article supplement (PMC11028909)
Supplement: 262_2015_1767_MOESM1_ESM.pdf [file 262_2015_1767_MOESM1_ESM.pdf]

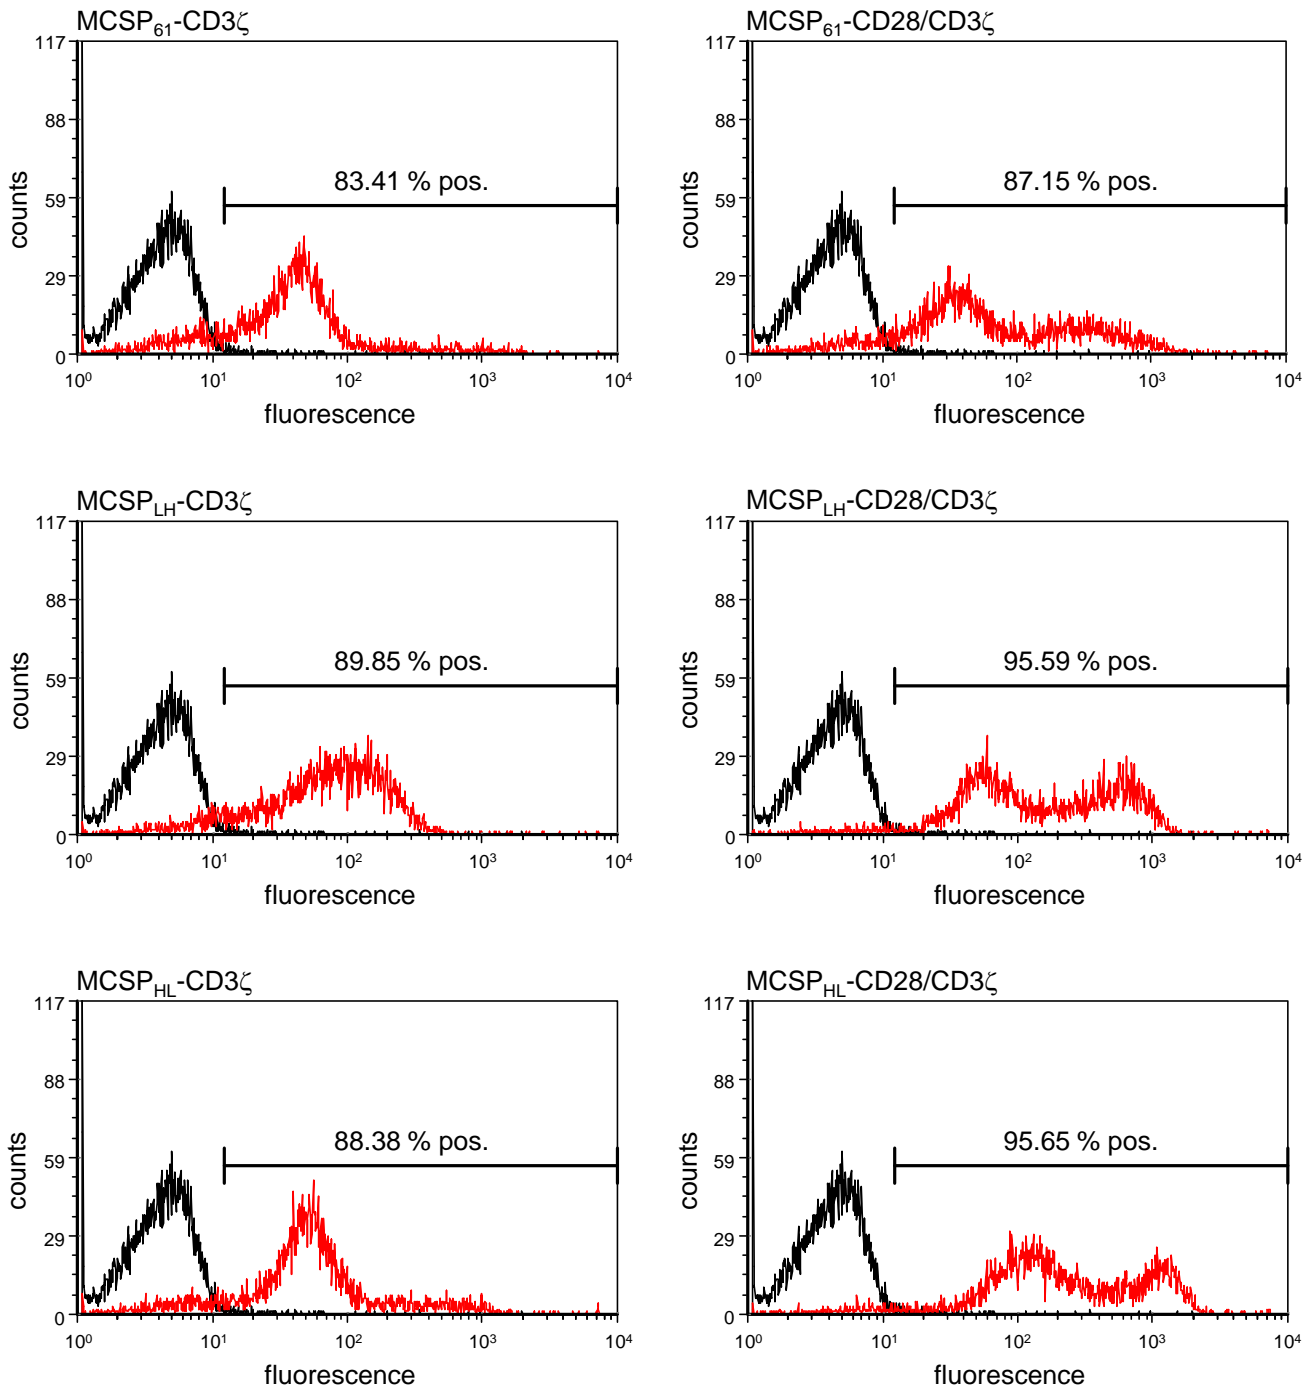

**Supplementary Fig. 1 Expression level of MCSP-specific CARs on CD4<sup>+</sup> T cells after RNA electroporation**

CD4<sup>+</sup> T cells were isolated from blood of healthy donors and activated for ten days using the agonistic anti-CD3 antibody OKT3 and IL-2. T cells were electroporated subsequently with mRNA encoding the different MCSP-specific 1<sup>st</sup> (left panels) or 2<sup>nd</sup> (right panels) generation CARs or without RNA. CAR-surface expression was determined 4 h after electroporation, by flow cytometry using a fluorescence-labeled antibody targeting the extracellular Fc-fragment. Histogram overlays showing the mock-electroporated T cells (black) and T cells transfected with RNA encoding the indicated CAR (red) are depicted. Markers were set to mock-electroporated T cells; percentages of positive cells (% pos.) are related to total CD4<sup>+</sup> T cells. One representative out of three individual experiments is shown.

Supplementary Figure 2

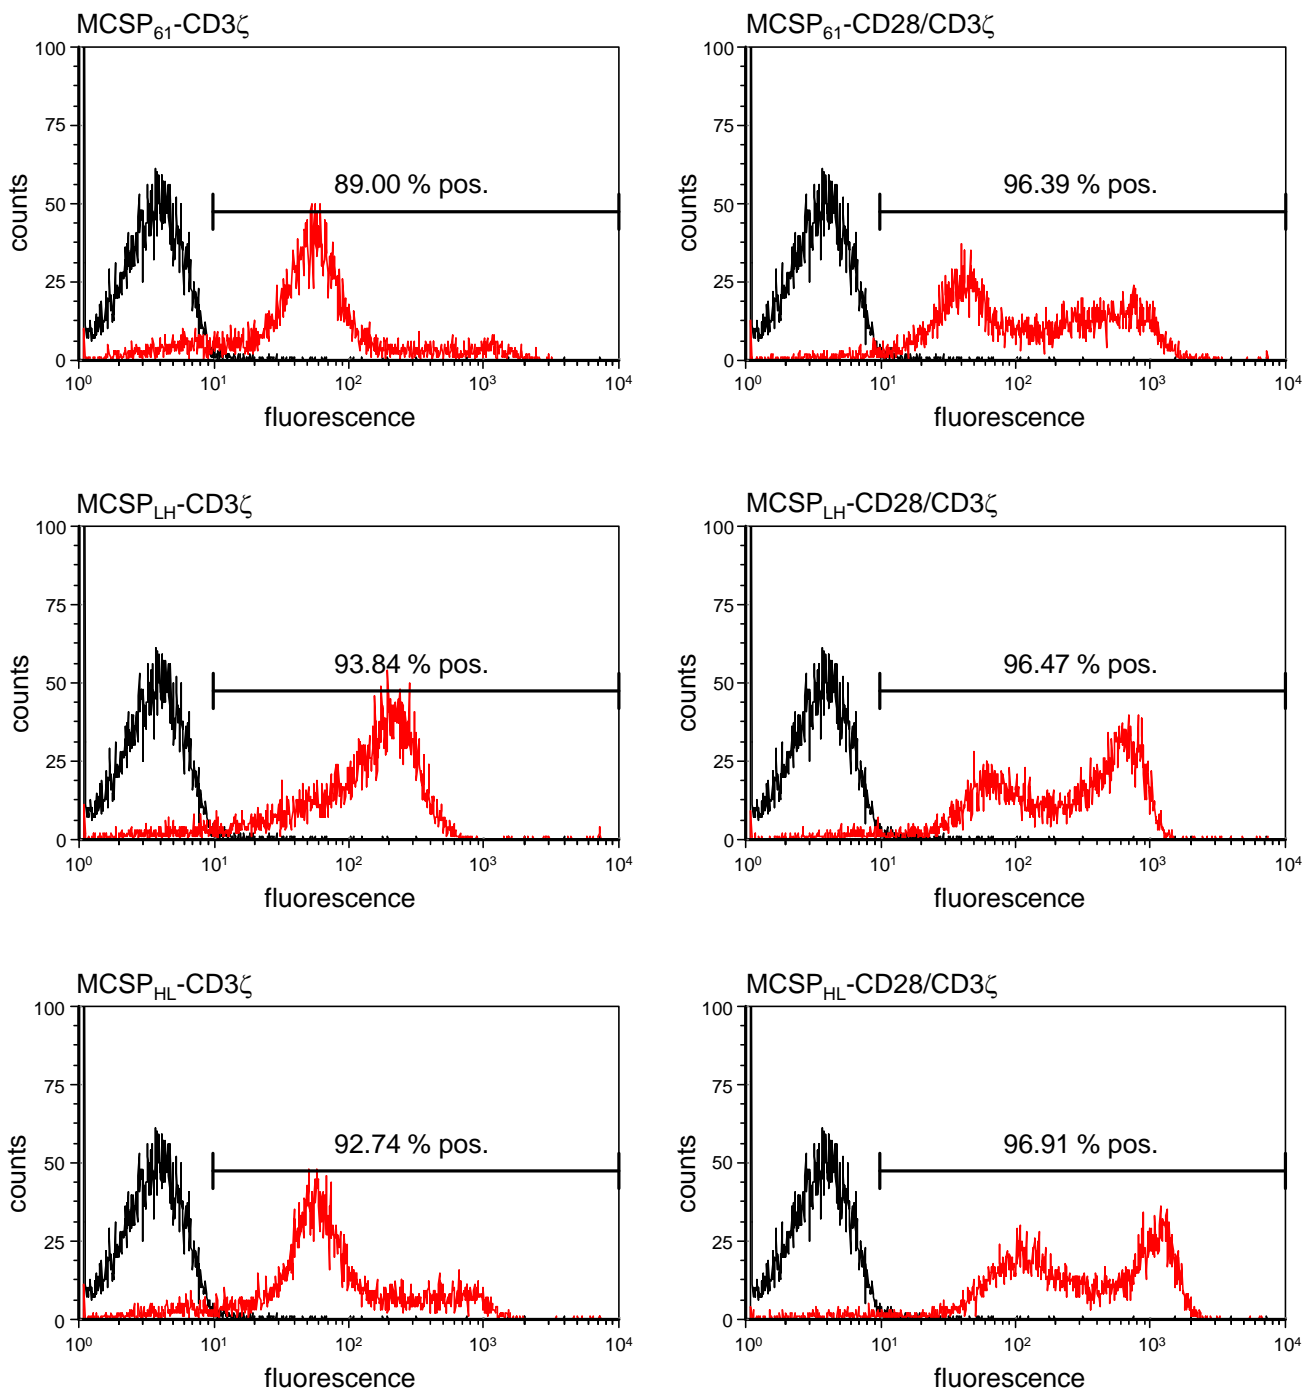

**Supplementary Fig. 2 Expression level of MCSP-specific CARs on CD8<sup>+</sup> T cells after RNA electroporation**

CD8<sup>+</sup> T cells were isolated from blood of healthy donors and activated for ten days using the agonistic anti-CD3 antibody OKT3 and IL-2. T cells were electroporated subsequently with mRNA encoding the different MCSP-specific 1<sup>st</sup> (left panels) or 2<sup>nd</sup> (right panels) generation CARs or without RNA. CAR-surface expression was determined 4 h after electroporation, by flow cytometry using a fluorescence-labeled antibody targeting the extracellular Fc-fragment. Histogram overlays showing the mock-electroporated T cells (black) and T cells transfected with RNA encoding the indicated CAR (red) are depicted. Markers were set to mock-electroporated T cells; percentages of positive cells (% pos.) are related to total CD8<sup>+</sup> T cells. One representative out of three individual experiments is shown.

Supplementary table S1:

p-values<sup>1</sup> corresponding to figure 1b, CD4<sup>+</sup> T cells

| conditions <sup>2</sup>      | time after electroporation |       |       |       |       |       |      |       |       |       |
|------------------------------|----------------------------|-------|-------|-------|-------|-------|------|-------|-------|-------|
|                              | 1 h                        | 2 h   | 4 h   | 8 h   | 12 h  | 24 h  | 48 h | 72 h  | 144 h | 216 h |
| 61-CD3ζ vs mock              | **                         | **    | **    | **    | *     | 0.075 | ns   | ns    | 0.085 | ns    |
| LH-CD3ζ vs mock              | 0.062                      | *     | *     | *     | 0.084 | ns    | ns   | ns    | 0.075 | ns    |
| HL-CD3ζ vs mock              | *                          | **    | *     | **    | *     | ns    | ns   | ns    | *     | ns    |
| 61-CD28-CD3ζ vs mock         | **                         | **    | **    | **    | *     | 0.054 | ns   | ns    | ns    | ns    |
| LH-CD28-CD3ζ vs mock         | *                          | *     | *     | **    | **    | **    | **   | *     | *     | *     |
| HL-CD28-CD3ζ vs mock         | **                         | ***   | **    | ***   | **    | **    | ***  | **    | *     | 0.089 |
| 61-CD3ζ vs 61-CD28-CD3ζ      | *                          | ns    | ns    | 0.05  | 0.093 | *     | ns   | ns    | ns    | ns    |
| LH-CD3ζ vs LH-CD28-CD3ζ      | *                          | **    | *     | *     | *     | **    | **   | 0.092 | ns    | ns    |
| HL-CD3ζ vs HL-CD28-CD3ζ      | **                         | **    | **    | **    | **    | **    | ***  | **    | *     | ns    |
| 61-CD3ζ vs LH-CD3ζ           | ns                         | ns    | ns    | ns    | ns    | **    | ns   | ns    | ns    | ns    |
| 61-CD3ζ vs HL-CD3ζ           | ns                         | ns    | ns    | ns    | ns    | *     | ns   | ns    | ns    | ns    |
| LH-CD3ζ vs HL-CD3ζ           | *                          | ns    | ns    | ns    | ns    | ns    | ns   | ns    | ns    | ns    |
| 61-CD28-CD3ζ vs LH-CD28-CD3ζ | ns                         | ns    | ns    | *     | *     | **    | **   | *     | ns    | ns    |
| 61-CD28-CD3ζ vs HL-CD28-CD3ζ | ns                         | 0.057 | *     | *     | *     | **    | **   | **    | ns    | ns    |
| LH-CD28-CD3ζ vs HL-CD28-CD3ζ | *                          | 0.072 | 0.099 | 0.082 | 0.057 | 0.093 | **   | *     | *     | ns    |

<sup>1</sup> calculated by paired student's t test from 3 independent experiments, \*\*\* p<0.001, \*\* p<0.01, \* p<0.05, ns p>0.1, p-values between 0.05 and 0.1 are specified. Calculations were performed based on the original, not on the normalized data.

<sup>2</sup> 61: MCSP<sub>61</sub>, LH: MCSP<sub>LH</sub>, HL: MCSP<sub>HL</sub>

Supplementary table S2:

p-values<sup>1</sup> corresponding to figure 1b, CD8<sup>+</sup> T cells

| conditions <sup>2</sup>      | time after electroporation |       |       |     |       |       |       |       |       |       |
|------------------------------|----------------------------|-------|-------|-----|-------|-------|-------|-------|-------|-------|
|                              | 1 h                        | 2 h   | 4 h   | 8 h | 12 h  | 24 h  | 48 h  | 72 h  | 144 h | 216 h |
| 61-CD3ζ vs mock              | *                          | ***   | ***   | **  | **    | **    | ns    | ns    | *     | ns    |
| LH-CD3ζ vs mock              | ns                         | 0.089 | *     | *   | *     | ns    | 0.064 | ns    | ns    | ns    |
| HL-CD3ζ vs mock              | *                          | *     | **    | *   | *     | 0.06  | ns    | ns    | ns    | ns    |
| 61-CD28-CD3ζ vs mock         | 0.058                      | **    | **    | **  | **    | *     | ns    | ns    | *     | ns    |
| LH-CD28-CD3ζ vs mock         | 0.062                      | *     | *     | *   | **    | **    | *     | **    | *     | *     |
| HL-CD28-CD3ζ vs mock         | *                          | **    | **    | **  | **    | **    | **    | ***   | *     | *     |
| 61-CD3ζ vs 61-CD28-CD3ζ      | ns                         | ns    | ns    | ns  | *     | ns    | ns    | ns    | 0.082 | ns    |
| LH-CD3ζ vs LH-CD28-CD3ζ      | **                         | *     | *     | *   | **    | **    | *     | *     | ns    | *     |
| HL-CD3ζ vs HL-CD28-CD3ζ      | *                          | **    | *     | **  | **    | **    | ***   | ***   | *     | 0.062 |
| 61-CD3ζ vs LH-CD3ζ           | ns                         | ns    | ns    | ns  | ns    | 0.054 | ns    | ns    | ns    | ns    |
| 61-CD3ζ vs HL-CD3ζ           | ns                         | ns    | ns    | ns  | ns    | 0.075 | ns    | ns    | ns    | ns    |
| LH-CD3ζ vs HL-CD3ζ           | ns                         | ns    | ns    | ns  | ns    | **    | ns    | ns    | ns    | ns    |
| 61-CD28-CD3ζ vs LH-CD28-CD3ζ | ns                         | ns    | ns    | ns  | 0.076 | 0.055 | ***   | 0.061 | 0.069 | ns    |
| 61-CD28-CD3ζ vs HL-CD28-CD3ζ | ns                         | ns    | 0.091 | *   | *     | 0.051 | **    | *     | *     | ns    |
| LH-CD28-CD3ζ vs HL-CD28-CD3ζ | *                          | ns    | ns    | ns  | ns    | *     | *     | *     | 0.055 | 0.065 |

<sup>1</sup> calculated by paired student's t test from 3 independent experiments, \*\*\* p<0.001, \*\* p<0.01, \* p<0.05, ns p>0.1, p-values between 0.05 and 0.1 are specified. Calculations were performed based on the original, not on the normalized data.

<sup>2</sup> 61: MCSP<sub>61</sub>, LH: MCSPLH, HL: MCSPLH

Supplementary table S3:

p-values<sup>1</sup> corresponding to figure 2

| conditions <sup>2</sup>      | E:T 60:1                   |      |      | E:T 20:1 |      |      |
|------------------------------|----------------------------|------|------|----------|------|------|
|                              | time after electroporation |      |      |          |      |      |
|                              | 2 h                        | 12 h | 24 h | 2 h      | 12 h | 24 h |
| 61-CD3ζ vs mock              | 0.06                       | ns   | *    | ns       | *    | ns   |
| LH-CD3ζ vs mock              | *                          | *    | *    | *        | **   | ns   |
| HL-CD3ζ vs mock              | **                         | ***  | **   | *        | ***  | ***  |
| 61-CD28-CD3ζ vs mock         | ns                         | **   | *    | ns       | 0.07 | *    |
| LH-CD28-CD3ζ vs mock         | **                         | **   | **   | **       | ***  | **   |
| HL-CD28-CD3ζ vs mock         | **                         | **   | **   | **       | ***  | ***  |
| 61-CD3ζ vs 61-CD28-CD3ζ      | ns                         | ns   | ns   | ns       | ns   | 0.08 |
| LH-CD3ζ vs LH-CD28-CD3ζ      | ns                         | ns   | **   | ns       | ns   | **   |
| HL-CD3ζ vs HL-CD28-CD3ζ      | ns                         | ns   | **   | ns       | ns   | **   |
| 61-CD3ζ vs LH-CD3ζ           | **                         | *    | ns   | *        | **   | ns   |
| 61-CD3ζ vs HL-CD3ζ           | **                         | **** | *    | *        | ***  | *    |
| LH-CD3ζ vs HL-CD3ζ           | ns                         | ns   | *    | ns       | *    | **   |
| 61-CD28-CD3ζ vs LH-CD28-CD3ζ | ***                        | *    | *    | **       | **   | *    |
| 61-CD28-CD3ζ vs HL-CD28-CD3ζ | ***                        | *    | *    | **       | **   | **   |
| LH-CD28-CD3ζ vs HL-CD28-CD3ζ | ns                         | ns   | ns   | ns       | ns   | ns   |

<sup>1</sup> calculated by paired student's t test from 4 independent experiments, \*\*\*\* p<0.0001, \*\*\* p<0.001, \*\* p<0.01, \* p≤0.05, ns p>0.1, p-values between 0.05 and 0.1 are specified.

<sup>2</sup> 61: MCSP<sub>61</sub>, LH: MCSP<sub>LH</sub>, HL: MCSP<sub>HL</sub>

Supplementary table S4:

p-values<sup>1</sup> corresponding to figure 3,

| conditions <sup>2</sup>      | IL-2                       |      |      | TNF  |      |      | IFN <sub>γ</sub> |      |      |
|------------------------------|----------------------------|------|------|------|------|------|------------------|------|------|
|                              | time after electroporation |      |      |      |      |      |                  |      |      |
|                              | 2 h                        | 12 h | 24 h | 2 h  | 12 h | 24 h | 2 h              | 12 h | 24 h |
| 61-CD3ζ vs mock              | ns                         | ns   | ns   | ns   | ns   | ns   | 0.06             | ns   | ns   |
| LH-CD3ζ vs mock              | ns                         | ns   | ns   | 0.06 | ns   | ns   | ns               | ns   | ns   |
| HL-CD3ζ vs mock              | 0.06                       | ns   | ns   | 0.08 | ns   | ns   | *                | ns   | 0.09 |
| 61-CD28-CD3ζ vs mock         | **                         | ns   | ns   | ns   | *    | ns   | **               | **   | ns   |
| LH-CD28-CD3ζ vs mock         | **                         | **   | ns   | *    | **   | 0.06 | **               | *    | *    |
| HL-CD28-CD3ζ vs mock         | *                          | 0.07 | **   | ns   | 0.06 | 0.08 | *                | 0.07 | *    |
| 61-CD3ζ vs 61-CD28-CD3ζ      | **                         | ns   | ns   | ns   | *    | ns   | *                | **   | ns   |
| LH-CD3ζ vs LH-CD28-CD3ζ      | 0.08                       | **   | ns   | *    | **   | 0.06 | **               | *    | *    |
| HL-CD3ζ vs HL-CD28-CD3ζ      | *                          | 0.06 | **   | ns   | 0.07 | 0.08 | ns               | 0.07 | *    |
| 61-CD3ζ vs LH-CD3ζ           | ns                         | ns   | ns   | ns   | ns   | ns   | 0.07             | ns   | ns   |
| 61-CD3ζ vs HL-CD3ζ           | ns                         | ns   | ns   | 0.09 | ns   | ns   | *                | ns   | ns   |
| LH-CD3ζ vs HL-CD3ζ           | ns                         | ns   | ns   | 0.08 | ns   | ns   | *                | ns   | 0.08 |
| 61-CD28-CD3ζ vs LH-CD28-CD3ζ | ns                         | **   | ns   | ns   | **   | 0.09 | 0.06             | *    | *    |
| 61-CD28-CD3ζ vs HL-CD28-CD3ζ | 0.06                       | 0.07 | **   | ns   | 0.07 | 0.09 | 0.05             | 0.09 | *    |
| LH-CD28-CD3ζ vs HL-CD28-CD3ζ | *                          | ns   | **   | ns   | ns   | ns   | 0.1              | ns   | *    |

<sup>1</sup> calculated by paired student's t test, \*\*\*\* p<0.0001, \*\*\* p<0.001, \*\* p<0.01, \* p≤0.05, ns p>0.1, p-values between 0.05 and 0.1 are specified.

<sup>2</sup> 61: MCSP<sub>61</sub>, LH: MCSP<sub>LH</sub>, HL: MCSP<sub>HL</sub>

Supplementary table S5:

p-values<sup>1</sup> corresponding to figure 5

| conditions <sup>2</sup> | target                |      |       |     |       |      |      |     |
|-------------------------|-----------------------|------|-------|-----|-------|------|------|-----|
|                         | T2.A1                 |      |       |     | A375M |      |      |     |
|                         | effector:target ratio |      |       |     |       |      |      |     |
|                         | 60:1                  | 20:1 | 6:1   | 2:1 | 60:1  | 20:1 | 6:1  | 2:1 |
| CEA vs mock             | ns                    | ns   | ns    | *   | **    | ns   | ns   | ns  |
| MCSP vs mock            | ns                    | ns   | ns    | *   | **    | *    | 0.06 | ns  |
| MCSP vs CEA             | ns                    | ns   | 0.061 | ns  | *     | *    | *    | *   |

<sup>1</sup> calculated by paired student's t test from 4 independent experiments, \*\* p<0.01, \* p≤0.05, ns p>0.1, p-values between 0.05 and 0.1 are specified.

<sup>2</sup> CEA: CEA CD28-CD3ζ CAR, MCSP: MCSP<sub>HL</sub> CD28-CD3ζ CAR, mock: no RNA

Supplementary table S6:

p-values<sup>1</sup> corresponding to figure 6a

| conditions <sup>2</sup>              | cytokine |       |       |
|--------------------------------------|----------|-------|-------|
|                                      | IL-2     | TNF   | IFNγ  |
| mock on T2.A1 vs mock on A375M       | ns       | ns    | ns    |
| mock on T2.A1 vs mock on KATO III    | 0.096    | 0.063 | 0.072 |
| mock on A375M vs mock on KATO III    | ns       | **    | ns    |
| CEA on T2.A1 vs CEA on A375M         | ns       | ns    | 0.072 |
| CEA on T2.A1 vs CEA on KATO III      | 0.085    | *     | *     |
| CEA on A375M vs CEA on KATO III      | 0.084    | *     | *     |
| MCSP on T2.A1 vs MCSP on A375M       | 0.05     | ns    | 0.077 |
| MCSP on T2.A1 vs MCSP on KATO III    | ns       | *     | ns    |
| MCSP on A375M vs MCSP on KATO III    | *        | *     | *     |
| mock on T2.A1 vs CEA on T2.A1        | ns       | ns    | *     |
| mock on T2.A1 vs MCSP on T2.A1       | ns       | *     | *     |
| CEA on T2.A1 vs MCSP on T2.A1        | ns       | ns    | ns    |
| mock on A375M vs CEA on A375M        | *        | *     | *     |
| mock on A375M vs MCSP on A375M       | 0.055    | *     | 0.06  |
| CEA on A375M vs MCSP on A375M        | 0.058    | *     | 0.06  |
| mock on KATO III vs CEA on KATO III  | 0.081    | *     | *     |
| mock on KATO III vs MCSP on KATO III | ns       | ns    | ns    |
| CEA on KATO III vs MCSP on KATO III  | 0.079    | *     | *     |

<sup>1</sup> calculated by paired student's t test from 3 independent experiments, \* p≤0.05, ns p>0.1, p-values between 0.05 and 0.1 are specified.

<sup>2</sup> CEA: CEA CD28-CD3ζ CAR, MCSP: MCSP<sub>HL</sub> CD28-CD3ζ CAR, mock: no RNA

Supplementary table S7:

p-values<sup>1</sup> corresponding to figure 6b

| conditions <sup>2</sup>        | cytokine               |    |    |       |       |       |    |    |       |       |       |       |
|--------------------------------|------------------------|----|----|-------|-------|-------|----|----|-------|-------|-------|-------|
|                                | IL-2                   |    |    |       | TNF   |       |    |    | IFNγ  |       |       |       |
|                                | time after thawing [h] |    |    |       |       |       |    |    |       |       |       |       |
|                                | 6                      | 24 | 48 | 72    | 6     | 24    | 48 | 72 | 6     | 24    | 48    | 72    |
| CEA on T2.A1 vs CEA on A375M   | ns                     | ns | ns | 0.064 | ns    | *     | ns | ns | 0.051 | 0.067 | ns    | ns    |
| MCSP on T2.A1 vs MCSP on A375M | **                     | ns | ns | ns    | 0.072 | 0.082 | ns | ns | **    | *     | 0.074 | 0.092 |
| CEA on T2.A1 vs MCSP on T2.A1  | *                      | ns | ns | ns    | ns    | ns    | ns | ns | ns    | ns    | ns    | ns    |
| CEA on A375M vs MCSP on A375M  | **                     | ns | ns | ns    | ns    | 0.095 | ns | ns | 0.057 | *     | 0.074 | ns    |

<sup>1</sup> calculated by paired student's t test from 3 independent experiments, \*\* p<0.01, \* p≤0.05, ns p>0.1, p-values between 0.05 and 0.1 are specified.

<sup>2</sup> CEA: CEA CD28-CD3ζ CAR, MCSP: MCSP<sub>HL</sub> CD28-CD3ζ CAR, mock: no RNA
